# Supplementary material for: Enabling targeted mass drug administration for schistosomiasis in north-western Tanzania: Exploring the use of geostatistical modeling to inform planning at sub-district level
Source: PLoS Negl Trop Dis. 2024 Jan 16;18(1):e0011896. doi: 10.1371/journal.pntd.0011896 (PMC10817176; doi:10.1371/journal.pntd.0011896)
Supplement: S2 Table — (XLSX) [file pntd.0011896.s002.xlsx]

## Sheet: Sheet1
	Mean	95%CI	Min.	Max.	Median
Pop. density (pop./km2)	15.64	14.15 - 17.04	3.553	214.1	9.246
Open defecation (% of pop.)	0.083	0.078 - 0.088	0.004	0.391	0.058
Vegetation (NDVI)	0.529	0.523 - 0.537	0.058	0.781	0.522
Lake distance (m)	7478	6969 - 8050	173	59294	4732
Ruggedness (TRI, m)	17.24	16.49 - 18.04	4.797	100.8	13.87
Wetness (TWI)	10.47	10.33 - 10.59	7.409	19.63	10.16
Temperature (LST, °C)	21.99	21.91 - 22.08	18.46	24.15	22.42
Elevation (DEM, m)	1246	1238 - 1257	788	1835	1220
Water source (% of pop.)	0.567	0.556 - 0.586	0.04	0.986	0.58
Stunting (% of pop. <5y/o)	0.354	0.348 - 0.358	0.191	0.565	0.335
Water index (NDWI)	-0.412	-0.008	-0.536	0.058	-0.411
